# Supplementary material for: NORE1A is a Ras senescence effector that controls the apoptotic/senescent balance of p53 via HIPK2
Source: PubMed Central journal article supplement — J Cell Biol. 2015 Mar 16;208(6):777–89. doi: 10.1083/jcb.201408087 (PMC4362463; doi:10.1083/jcb.201408087), 2015-03-16
Supplement: supp_jcb.201408087_JCB_201408087_sm.pdf [file supp_jcb.201408087_JCB_201408087_sm.pdf]

Donninger et al., <http://www.jcb.org/cgi/content/full/jcb.201408087/DC1>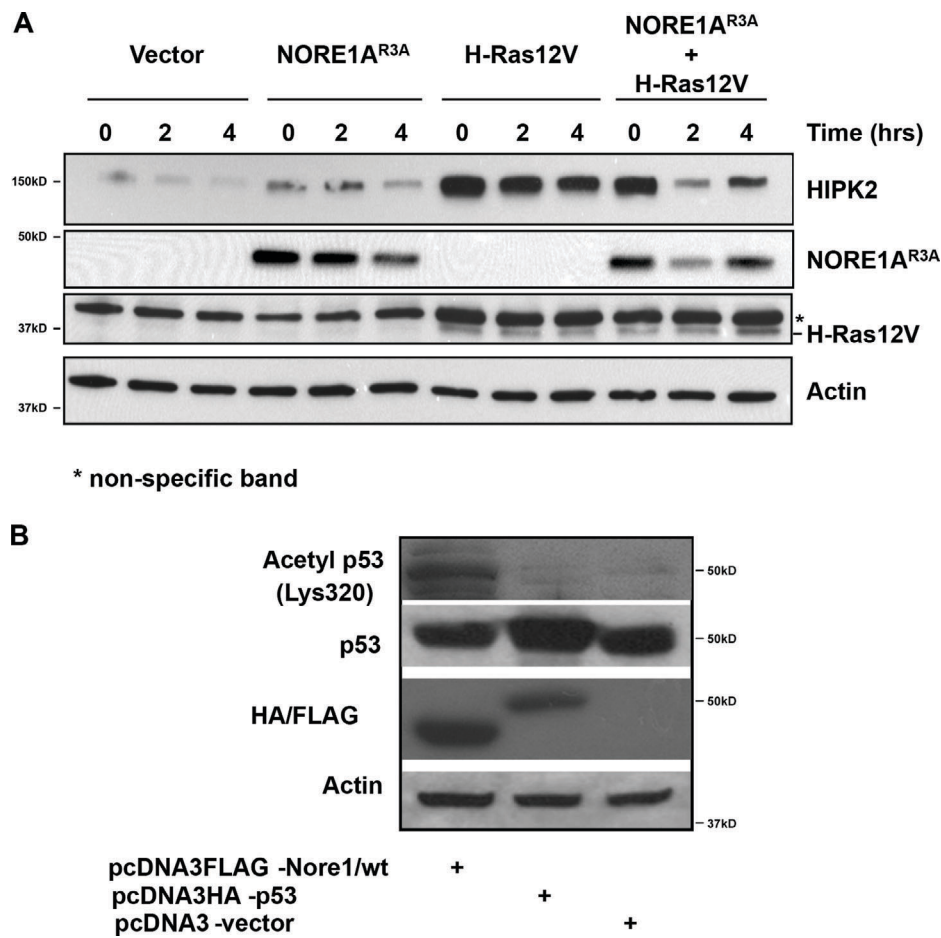

Figure S1. **NORE1A<sup>R3A</sup> fails to stabilize HIPK2.** (a) HEK-293 cells were transfected with HIPK2, NORE1A and activated H-Ras expression constructs. The cells were treated with cyclohexamide and lysed at the indicated time points. Levels of protein were determined by Western blot analysis. (b) HEK293 cells were transiently transfected with vector, NORE1A or p53 expression plasmids. The cell lysates were then Western blotted for the total levels of each protein and the degree of p53 acetylation at residue K320 using a specific antibody (Cell Signaling Technology). In the presence of NORE1A, endogenous p53 exhibited enhanced K320 acetylation.

Table S1. Description of cell lines used

| CELL LINE                              | RAS Status | P53 status | HIPK2 status | NORE1A Status | REMARKS                                                                                                                                                        |
|----------------------------------------|------------|------------|--------------|---------------|----------------------------------------------------------------------------------------------------------------------------------------------------------------|
| A549 human lung tumor cell line        | mutant     | WT         | +            | -             | Can be induced to undergo senescence by NORE1A transfection.                                                                                                   |
| MEFs                                   | WT         | WT         | +            | +             | Primary murine cells with senescence machinery intact                                                                                                          |
| HBEC-3KT<br>Human lung                 | WT         | WT         | +            | +             | Human lung epithelial cells immortalized without the use of viral oncogenes.                                                                                   |
| HEK-293 cells<br>Human kidney          | WT         | WT         | +            | +             | Human embryonic kidney cells. Excellent cell line for transient transfection experiments due to ease of transfection and relatively high levels of expression. |
| HEK-293T<br>Human kidney               | WT         | inhibited  | +            | +             | As above but expressing SV40 LT which compromises p53. Higher levels of expression from transiently transfected plasmids.                                      |
| COS-7<br>Monkey kidney                 | WT         | WT         | ?            | ?             | Express high levels of protein from transiently transfected plasmids. Possess large, flat nuclei, ideal for visualizing fluorescent nuclear proteins.          |
| HuH6<br>Human hepatocellular carcinoma | WT (MET*)  | WT         | +            | +             | Express both NORE1A and HIPK2. Constitutively phosphorylated MET receptor may activate the WT Ras pathway.                                                     |
| HepG2 Human hepatocellular carcinoma   | mutant     | WT         | +            | +             | Contain mutant Ras, express both NORE1A and HIPK2. Can be used for endogenous co-IP.                                                                           |

Table S2. The clinicopathological features of HCC patient samples

| Variables                   | Features          |                   |
|-----------------------------|-------------------|-------------------|
|                             | HCCB <sup>a</sup> | HCCP <sup>b</sup> |
| No. of patients             | 20                | 20                |
| Male                        | 15                | 16                |
| Female                      | 5                 | 4                 |
| Age (mean ± SD)             | 71.8 ± 8.9        | 73.4 ± 10.0       |
| Etiology                    |                   |                   |
| HBV                         | 9                 | 10                |
| HCV                         | 7                 | 6                 |
| Ethanol                     | 4                 | 4                 |
| Cirrhosis                   |                   |                   |
| +                           | 16                | 15                |
| -                           | 4                 | 5                 |
| Tumor size                  |                   |                   |
| >5 cm                       | 11                | 14                |
| <5 cm                       | 9                 | 6                 |
| Edmondson and Steiner grade |                   |                   |
| II                          | 8                 | 3                 |
| III                         | 5                 | 8                 |
| IV                          | 7                 | 9                 |
| Alpha-fetoprotein secretion |                   |                   |
| >300 ng/ml of serum         | 12                | 10                |
| <300 ng/ml of serum         | 8                 | 10                |

<sup>a</sup>HCCB, HCC with better outcome/longer survival (survival >3 yr after partial liver resection)

<sup>b</sup>HCCP, HCC with poorer outcome/shorter survival (survival <3 yr after partial liver resection)
